# Supplementary material
Source: PubMed Central journal article supplement (PMC4649254)
Supplement: Supp_Table1.pdf [file Supp_Table1.pdf]

## Supplementary Data

SUPPLEMENTARY TABLE S1. COMPARISON OF FOLD CHANGE OBSERVED IN PRR EXPRESSION  
BETWEEN REAL-TIME PCR AND PCR ARRAY

| <i>Genes</i> | <i>N2a18je</i> | <i>N2a18je-by array</i> | <i>SJMB</i> | <i>SJMB-by array</i> | <i>AJMB</i> | <i>AJMB-by array</i> |
|--------------|----------------|-------------------------|-------------|----------------------|-------------|----------------------|
| TLR1         | 2              | 1.07141                 | 1.49        | 3.9705               | 1.05        | 3.8861               |
| TLR2         | 2.51           | 4.6448                  | 3.34        | 2.2647               | 103.3       | 146.8636             |
| TLR3         | 4.69           | 14.6721                 | 5.86        | 2.8695               | 7.88        | 7.353                |
| TLR4         | 1.14           | 2.182                   | 3.16        | 7.1075               | 5.65        | 38.5413              |
| TLR5         | 1.58           | 2.07859                 | 2.96        | 17.0221              | 1.41        | -1.4953              |
| TLR6         | -1.07          | 1.604                   | 5.65        | 7.6529               | 1.51        | 4.1077               |
| TLR7         | -1.12          | 1.4964                  | 1.41        | 6.0461               | 3.27        | 12.8023              |
| TLR8         | 3.01           | 1.04244                 | 3.45        | 8.7705               | -7.72       | 1.09925              |
| TLR9         | 1.05           | 8.0084                  | 1.79        | 3.6706               | 2.98        | 14.69                |
| Myd88        | -1.06          | -1.87                   | -6.49       | -1.239               | 3.45        | 4.0655               |
